# Supplementary material for: Tick-Borne Encephalitis Virus Adaptation in Different Host Environments and Existence of Quasispecies
Source: MDPI journal article supplement (doi:10.3390/v12080902), 2020-08-18
Supplement: s1 [file s1]

## Supplementary Material

**Supplementary Table S1: List of sequencing primers used to amplify overlapping regions of the TBEV genome.**

| Primer name        | Polarity* | Nucleotide Sequence 5'→3'         | Annealing Temperature [ °C] | Genome Position ** |
|--------------------|-----------|-----------------------------------|-----------------------------|--------------------|
| 1C                 | F         | AGA TTT TCT TGC ACG T             | 48                          | 1-16               |
| 1D                 | R         | TTC CTT CAG CTC TGA TC            | 48                          | 532-516            |
| 2C                 | F         | GGT CAT TAC TCT GTT GGG GA        | 45                          | 450-469            |
| 2D                 | R         | ACA CAT CCA TTG AAG GCT TC        | 45                          | 1102-1083          |
| 1A                 | F         | TGT CTA CGC TTC GCG TTG CAC ACA   | 55                          | 963-986            |
| 1B                 | R         | GGA ACC CCA GCG AGA GCC TTC AGT A | 55                          | 1787-1763          |
| 2A                 | F         | CGT GTT GAA TTT GGG GCT CCT CAC G | 54                          | 1693-1717          |
| 2B                 | R         | TTC GTT CCG TGT CCA CAG CGC A     | 54                          | 2491-2470          |
| 1M                 | F         | GCT TTC AAC AGC ATC TTC GG        | 49                          | 2302-2321          |
| 1N                 | R         | TGT TAT ACC AGG ATC TGG GTC C     | 49                          | 3229-3208          |
| 2M                 | F         | ACT TTT GGT CAC TGA CCT GAG G     | 49                          | 3105-3126          |
| 2N                 | R         | TCC ATG ATG CAC AGT CAC CA        | 49                          | 4032-4013          |
| 1O                 | F         | GCT GGT CCT GGA ATT GGG GC        | 52.8                        | 3855-3874          |
| 1P                 | R         | GGA CCG GCC ACA GCA TCA TC        | 52.8                        | 4808-4789          |
| 2O                 | F         | GGT CGA GAG CGT GGT GAT AG        | 50.8                        | 4627-4646          |
| 2P                 | R         | CAG GAG GTG TCG CTG TCA TC        | 50.8                        | 5575-5556          |
| 1R                 | F         | CCT ATG TCA ACA GAC GGC TAC T     | 50                          | 5408-5429          |
| 1S                 | R         | GGC TCC TAA AGG TAA CCA AGT C     | 50                          | 6358-6337          |
| 2R                 | F         | GCC CGT GGC CAC CTT CTA TG        | 52.8                        | 6114-6133          |
| 2S                 | R         | CCC CCC GTT CAC TCC ACA AC        | 52.8                        | 6976-6957          |
| 1K                 | F         | CCG AGG CGG GAA AAC AGA GA        | 50.8                        | 6821-6840          |
| 1L                 | R         | AGG ATG CCA GTG CGC CTG TA        | 50.8                        | 7763-7744          |
| TBE-7547 (K2)***   | F         | CTG ACA CGT TGT GGA CGA TG        | 50                          | 7547-7566          |
| TBE-c8732 (K7)***  | R         | AAC ACT CTC TGC TGT CCG AAA G     | 50                          | 8732-8711          |
| TBE-8641 (K3)***   | F         | GTG AAA CTT CTC AGC TGG CC        | 42                          | 8641-8660          |
| TBE-c9685 (K8)***  | R         | TTG CCA AAT CTG TCA TCC           | 42                          | 9695-9678          |
| TBE-9244 (K4)***   | F         | AAT GGA GGA CTC TTC TAT GCA G     | 49                          | 9244-9265          |
| TBE-c10140 (K6)*** | R         | CAT GAA AGG GTT GTC CAG AAT C     | 49                          | 10140-10119        |
| TBE-2E hypr        | F         | TTG TTC ACA CCA CTT CCA CG        | 47                          | 9792-9811          |
| TBE-2T hypr        | F         | CGT TGG GAG GAA AGA AAG AG        | 47                          | 10218-10237        |
| 1F                 | R         | AGC GGG TGT TTT TCC GAG TC        | 47                          | 10835-10816        |

\* F—forward primer, R—reverse primer. \*\* according to the genome of TBEV strain Hypr (gb: U39292). \*\*\* Kupča *et al.*, 2010 - modified.

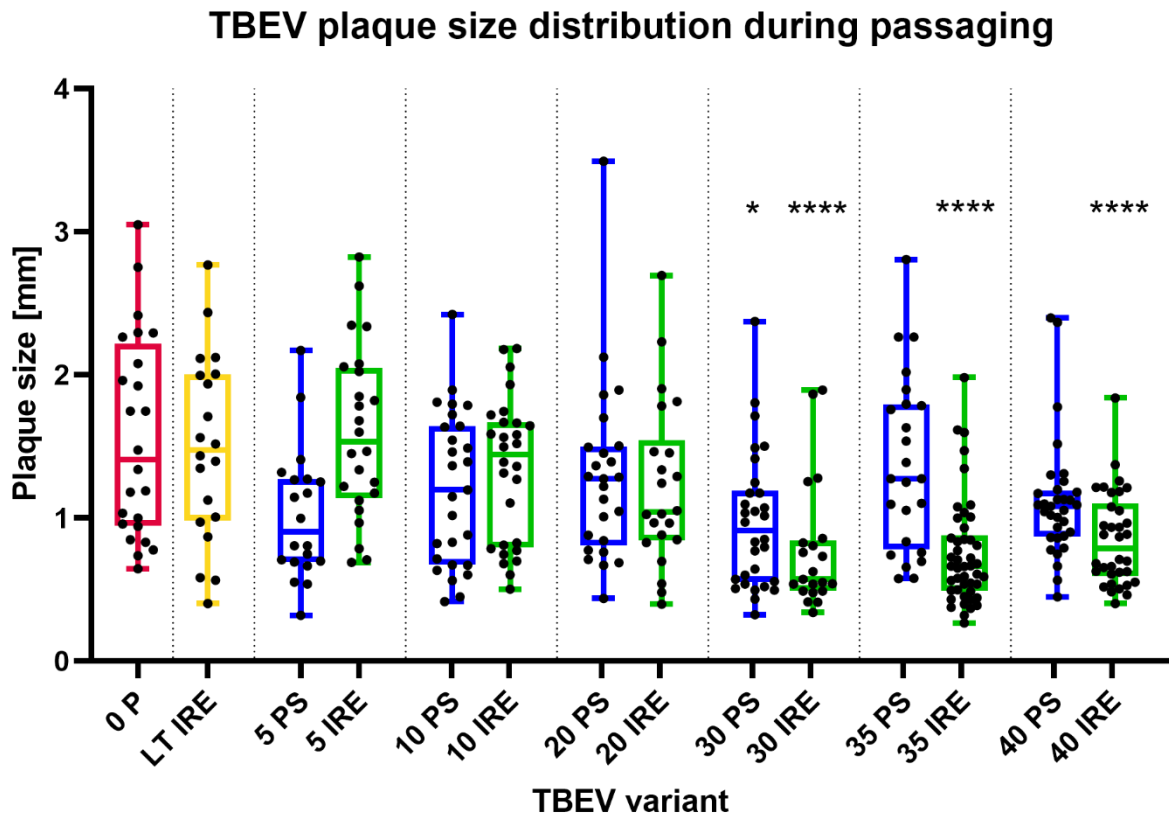

**Supplementary Figure S1.** TBEV plaque size distribution during passages in porcine kidney stable (PS) and tick (IRE/CTVM19) cells. The Hypr strain of TBEV (0 P; red) was passaged sequentially 5, 10, 20, 30, 35 and 40 times in PS (blue) or IRE/CTVM19 (green) cell lines, giving rise to the viral variants 5 PS – 40 PS and 5 IRE – 40 IRE respectively, or maintained continuously for a month-long period without passaging in IRE/CTVM19 (yellow) cells producing the LT IRE variant. The diameters of a minimum of 20 (range 20-46) randomly-chosen discrete plaques per viral variant were measured using ImageJ software in duplicate and mean value sizes were plotted as a box plot. The middle line indicates the median, the hinges correspond to the 25th-75th percentiles, the whiskers extend to minimum and maximum values measured, and the points represent individual plaques. Statistical evaluation of plaque size in comparison to the parental strain Hypr 0 P was done in GraphPad Prism 8 software using Kruskal-Wallis test followed by Dunn's post hoc test corrected for multiple comparisons; statistically-significant differences are indicated by asterisks (\* <0.05, \*\*\*\* <0.0001).

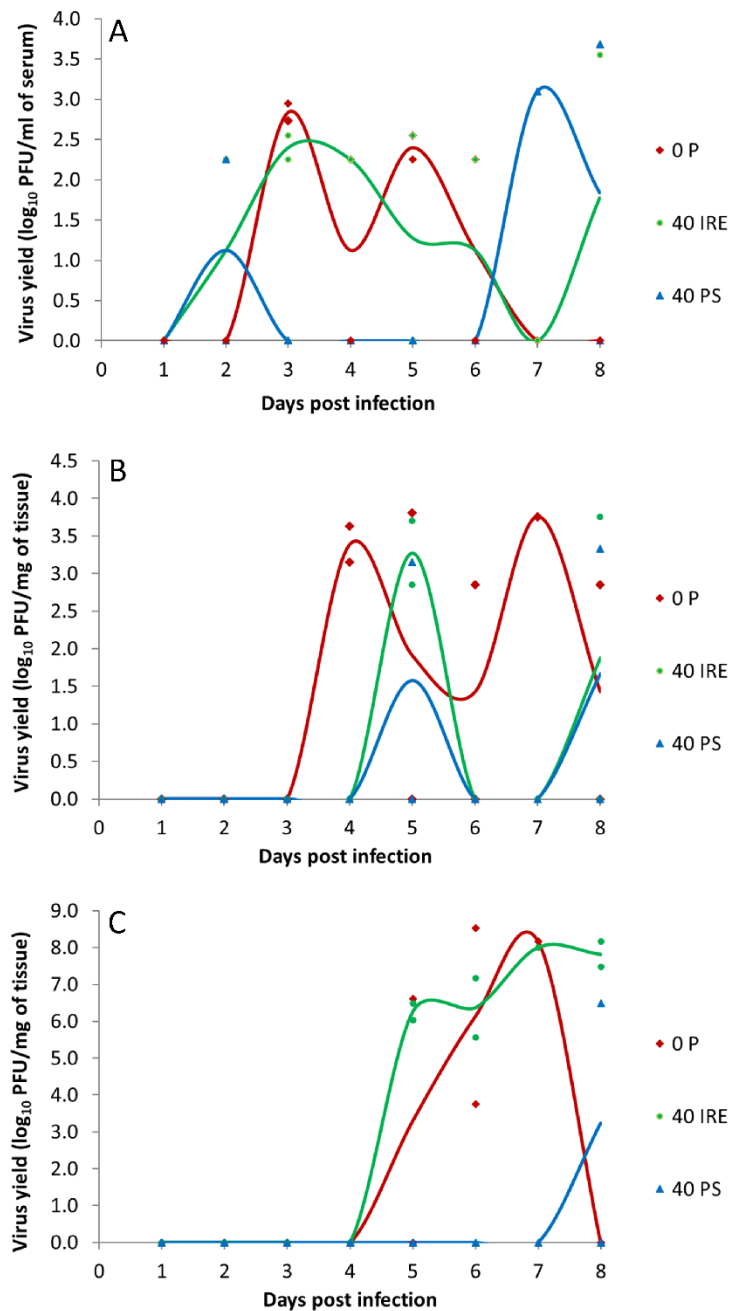

**Supplementary Figure S2.** Replication of mammalian cell- and tick cell-derived variants of TBEV in mice. Female CD1 mice were infected subcutaneously with 100 PFU of either parental TBEV strain 0P (red and diamonds) or derived viral variants 40 PS (blue and triangles) or 40 IRE (green and circles). The amount of viral RNA retrieved in (A) serum, (B) spleen, (C) brain was determined by quantitative RT-PCR. The calibration curve for qRT-PCR was based on determination of the viral titre by plaque assay and results are thus expressed as log<sub>10</sub> PFU/ml of serum or PFU/g of tissue. Individual values are indicated by symbols, lines represent mean values (two mice were sampled per day except for day 7 p.i. when only one mouse was sampled) and show the indicative course of infection for easier evaluation of the data. Samples and standards were analyzed in technical triplicates.
